# Supplementary material
Source: PubMed Central journal article supplement (PMC2871374)

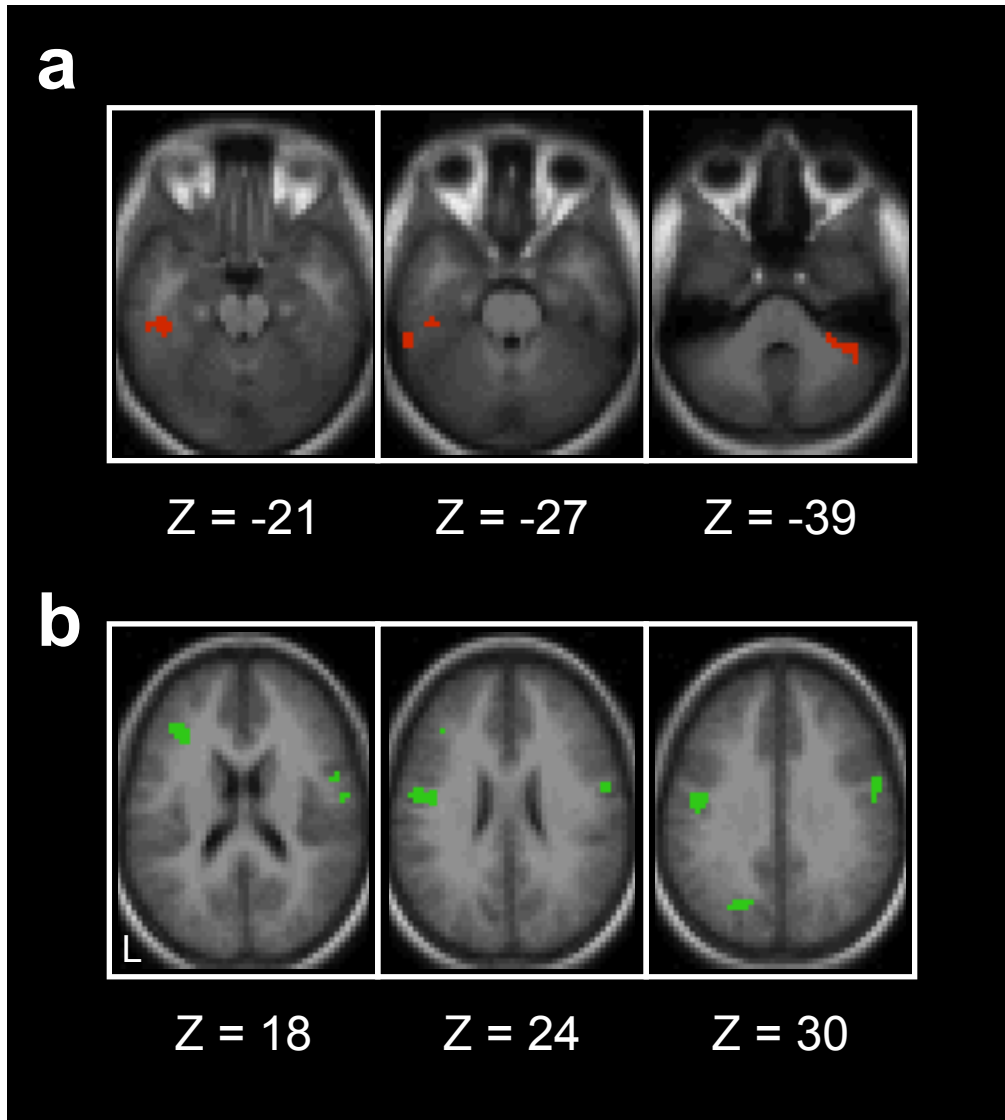

Figure S1

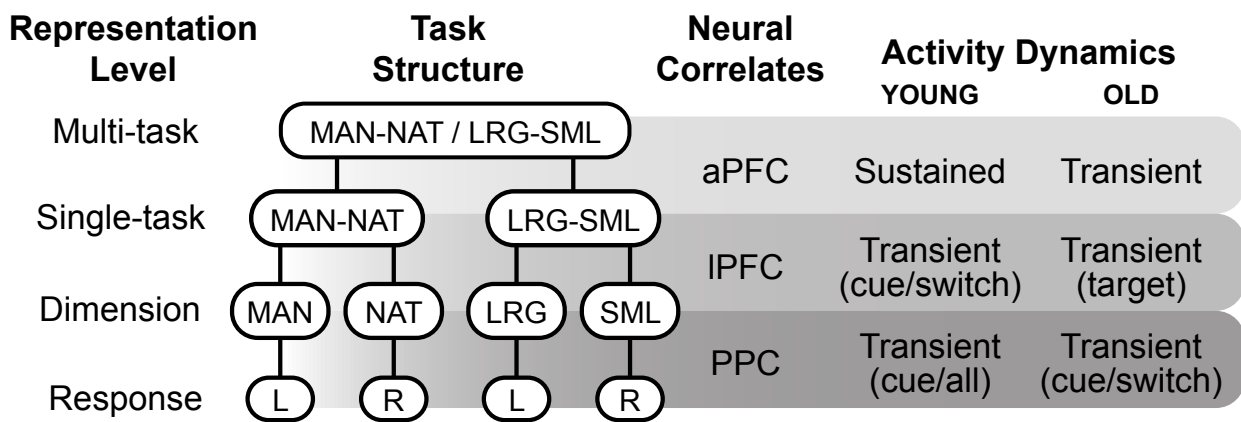

Figure S2

Supplement: bhp206_1.pdf [file bhp206_1.pdf]
